# Supplementary material for: C2 and CFB Genes in Age-Related Maculopathy and Joint Action with CFH and LOC387715 Genes
Source: PLOS journal article supplement (doi:10.1371/journal.pone.0002199), 2008-05-21
Supplement: S1 (10.1371/journal.pone.0002199.s001) [file journal.pone.0002199.s001]

# Logistic regression analyses

## Coding in two-factor models

A series of logistic regression models were fitted to the data in order to find a parsimonious model for the joint effects of each pair of loci. Models allowing for additive effects (ADD1, ADD2, and ADD-BOTH), models incorporating dominance effects (DOM1, DOM2, and DOM-BOTH), and three interaction models (ADD-INT, ADD-DOM, and DOM-INT) were fitted. In the additive models the genotypes,  $RR$ ,  $RN$ , and  $NN$  (or  $PP$ ,  $PN$ , and  $NN$ ), are coded 1, 0, and 1, respectively; where  $R$  denotes the assumed risk allele at *CFH* or *LOC387715*,  $P$  the assumed protective allele at *C2*, and  $N$  the assumed normal allele. The dominance models incorporate a variable to the additive models coded as 0.5 for  $RR$  (or  $PP$ ) and  $NN$  and 0.5 for  $RN$  (or  $PN$ ). We let  $x_1$  and  $x_2$  denote the genotype variables in the additive models, and  $z_1$  and  $z_2$  the additional variables incorporated into the dominance models. Then the ADD1, ADD2, and ADD-BOTH models include terms  $(x_1)$ ,  $(x_2)$ , and  $(x_1 \text{ and } x_2)$ , respectively, and the DOM1, DOM2, DOM-BOTH models incorporate terms  $(z_1)$ ,  $(z_2)$ , and  $(z_1 \text{ and } z_2)$  to the ADD1, ADD2, and ADD-BOTH models, respectively. Three further interaction models are fitted: ADD-INT incorporates the product term  $(x_1x_2)$  to the ADD-BOTH model, ADD-DOM incorporates the product terms  $(x_1x_2, x_1z_2, \text{ and } z_1x_2)$ , and DOM-INT incorporates the product terms  $(x_1x_2, x_1z_2, z_1x_2, \text{ and } z_1x_2)$  to the DOM-BOTH model.

## Coding in three-factor models

Since, for each pair of loci, the two-factor analyses implicated additive models as the most parsimonious and to keep the number of parameters as small as possible we only fit three-factor additive models without interaction. The models are ADD1, ADD2, ADD3, ADD12, ADD13, ADD23, and ADD123 and include terms  $(x_1)$ ,  $(x_2)$ ,  $(x_3)$ ,

$(x_1$  and  $x_2)$ ,  $(x_1$  and  $x_3)$ ,  $(x_2$  and  $x_3)$ , and  $(x_1, x_2,$  and  $x_3)$ , respectively, where  $x_1$ ,  $x_2$ , and  $x_3$ , are coded as in the additive two-factor models above.
